# Supplementary material for: Trio-based whole exome sequencing in patients with suspected sporadic inborn errors of immunity: A retrospective cohort study
Source: eLife. 2022 Oct 17;11:e78469. doi: 10.7554/eLife.78469 (PMC9635875; doi:10.7554/eLife.78469)
Supplement: Figure 1—figure supplement 1—source data 1. [file elife-78469-fig1-figsupp1-data1.xlsx]

## Sheet: Sheet 1
Number of candidate DNMs per case	Frequency
0	33
1	42
2	29
3	10
4	4
5	4
6	1
