# Supplementary material for: Trio-based whole exome sequencing in patients with suspected sporadic inborn errors of immunity: A retrospective cohort study
Source: eLife. 2022 Oct 17;11:e78469. doi: 10.7554/eLife.78469 (PMC9635875; doi:10.7554/eLife.78469)
Supplement: Figure 2—source data 3. [file elife-78469-fig2-data3.xlsx]

## Sheet: Sheet1
	IL-1β (pg/mL)		IL-6 (pg/mL)		TNF-a (pg/mL)
Stimulus	Healthy control	Patient 59	Healthy control	Patient 59	Healthy control	Patient 59
RPMI	<97	<97	<92	<92	<78	<78
Candida Heat-Killed (1x106/ml)	4834	8692	3784	2882	2126	2109
E.Coli LPS (10 ng/ml)	2865	5187	8714	9967	<78	<78
Staphyloccocus Aureus Heat-Killed (1x106/ml)	4277	8617	7682	6609	845	1864
PHA (10 µg/ml)	<97	136	3958	5545	<78	<78
Poly I:C (10 μg/ml)	101	1232	545	744	<78	<78
