# Supplementary material for: Trio-based whole exome sequencing in patients with suspected sporadic inborn errors of immunity: A retrospective cohort study
Source: eLife journal article supplement (doi:10.7554/elife.78469), 2022-10-07
Supplement: supp [file elife-78469-supp-v1.zip]

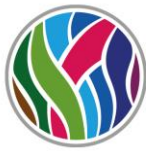

## ***eLife's* transparent reporting form**

We encourage authors to provide detailed information *within their submission* to facilitate the interpretation and replication of experiments. Authors can upload supporting documentation to indicate the use of appropriate reporting guidelines for health-related research (see [EQUATOR Network](#)), life science research (see the [BioSharing Information Resource](#)), or the [ARRIVE guidelines](#) for reporting work involving animal research. Where applicable, authors should refer to any relevant reporting standards documents in this form.

If you have any questions, please consult our Journal Policies and/or contact us: [editorial@elifesciences.org](mailto:editorial@elifesciences.org).

### **Sample-size estimation**

- You should state whether an appropriate sample size was computed when the study was being designed
- You should state the statistical method of sample size computation and any required assumptions
- If no explicit power analysis was used, you should describe how you decided what sample (replicate) size (number) to use

Please outline where this information can be found within the submission (e.g., sections or figure legends), or explain why this information doesn't apply to your submission:

This study included all trio-based whole exome sequencing datasets encountered in Genome Diagnostics between May 2013 and November 2021 at the Department of Human Genetics in the Radboud University Medical Center that were eligible for inclusion in our study to answer our primary research questions (Methods – Patients and samples). A sample-size estimation or power analysis was not applicable as our study is exploratory and descriptive, and results were analysed on an individual case basis.



### Replicates

- You should report how often each experiment was performed
- You should include a definition of biological versus technical replication
- The data obtained should be provided and sufficient information should be provided to indicate the number of independent biological and/or technical replicates
- If you encountered any outliers, you should describe how these were handled
- Criteria for exclusion/inclusion of data should be clearly stated
- High-throughput sequence data should be uploaded before submission, with a private link for reviewers provided (these are available from both GEO and ArrayExpress)

Please outline where this information can be found within the submission (e.g., sections or figure legends), or explain why this information doesn't apply to your submission:

The RNA splicing effect was assessed without biological or technical replicates (Methods – RNA splicing effect, Figure 2 – figure supplement 1).  
ELISAs for cytokine measurements were performed without biological or technical replicates (Methods - Ex vivo peripheral mononuclear blood cell (PBMC) experiments, Methods – Cytokine measurements, Figure 2B-D).  
PBMC stimulation was performed in biological duplicates (Methods - Ex vivo peripheral mononuclear blood cell (PBMC) experiments, Figure 2A). Duplicates were pooled for flow cytometry (Methods – Flow Cytometry, Figure 2A).

### Statistical reporting

- Statistical analysis methods should be described and justified
- Raw data should be presented in figures whenever informative to do so (typically when N per group is less than 10)
- For each experiment, you should identify the statistical tests used, exact values of N, definitions of center, methods of multiple test correction, and dispersion and precision measures (e.g., mean, median, SD, SEM, confidence intervals; and, for the major substantive results, a measure of effect size (e.g., Pearson's r, Cohen's d)
- Report exact p-values wherever possible alongside the summary statistics and 95% confidence intervals. These should be reported for all key questions and not only when the p-value is less than 0.05.

Please outline where this information can be found within the submission (e.g., sections or figure legends), or explain why this information doesn't apply to your submission:

Since experiments are performed for single patients and results are analysed as well as presented as n=1 cases, information on statistical reporting does not apply to our submission.

(For large datasets, or papers with a very large number of statistical tests, you may upload a single table file with tests, Ns, etc., with reference to sections in the manuscript.)

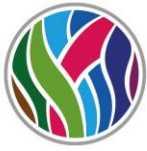

### Group allocation

- Indicate how samples were allocated into experimental groups (in the case of clinical studies, please specify allocation to treatment method); if randomization was used, please also state if restricted randomization was applied
- Indicate if masking was used during group allocation, data collection and/or data analysis

Please outline where this information can be found within the submission (e.g., sections or figure legends), or explain why this information doesn't apply to your submission:

Since this is a clinical cohort study without an intervention or treatment method, information on group allocation does not apply to our submission.

### Additional data files ("source data")

- We encourage you to upload relevant additional data files, such as numerical data that are represented as a graph in a figure, or as a summary table
- Where provided, these should be in the most useful format, and they can be uploaded as "Source data" files linked to a main figure or table
- Include model definition files including the full list of parameters used
- Include code used for data analysis (e.g., R, MatLab)
- Avoid stating that data files are "available upon request"

Please indicate the figures or tables for which source data files have been provided:

Source data for candidate *de novo* variant evaluation is provided in Figure 1 – table supplement 2  
Source data linked to Figure 2 – figure supplement 1A is an uncropped, raw gel image used to create this figure.  
Source data linked to Figure 2B-D is provided as an additional, numerical data file.
