# Supplementary material for: Trio-based whole exome sequencing in patients with suspected sporadic inborn errors of immunity: A retrospective cohort study
Source: eLife journal article supplement (doi:10.7554/elife.78469), 2022-10-07
Supplement: supp [file elife_poa_e78469_Figure_1_figure_supplement_1.docx]

**
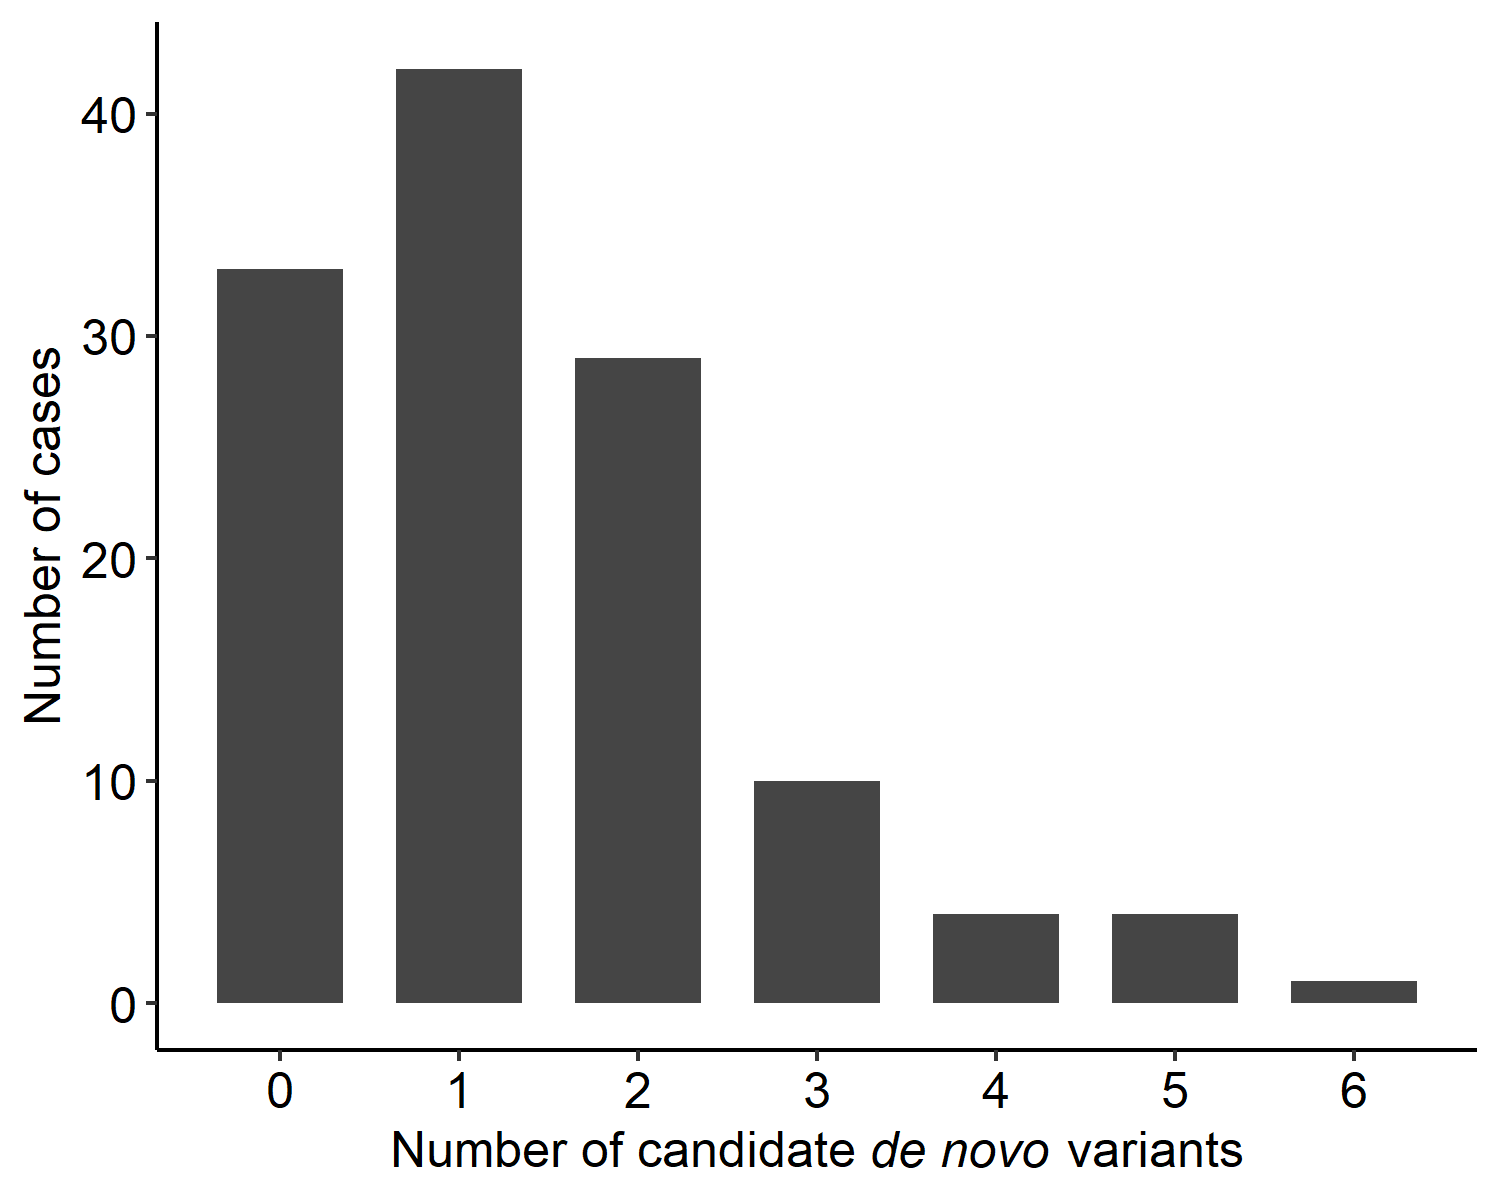
Figure 1 – figure supplement 1. Distribution of rare, non-synonymous coding *de novo* variants among cases.** ***Figure 1 – figure supplement 1 – source data 1.***
